# Supplementary material for: The apatinib and pemetrexed combination has antitumor and antiangiogenic effects against NSCLC
Source: PubMed Central journal article supplement (PMC9993329; doi:10.1515/biol-2022-0533), 2023-03-07
Supplement: biol-2022-0533-sm.pdf [file biol-2022-0533-sm.pdf]

# Supplementary Materials

See Tables S1–S3 and Figures S1–S4 in the Supplementary Material for expanded data.

**Table S1:** The cell viability of A549 cells in different combination modes

| A concentration (μM) | B1 concentration (μM) | A549 cell viability % |          |          |
|----------------------|-----------------------|-----------------------|----------|----------|
| 5                    |                       | 48.48066              | 50.13812 | 48.75691 |
| 1.592356688          |                       | 71.54696              | 83.01105 | 82.18232 |
| 0.507119964          |                       | 83.28729              | 83.56354 | 92.12707 |
| 0.161503173          |                       | 93.09392              | 94.47514 | 95.58011 |
| 0.051434132          |                       | 100.6906              | 98.34254 | 95.99448 |
| 4                    | 1                     | 26.40693              | 24.5671  | 32.35931 |
| 1.27388535           | 0.318471338           | 48.16017              | 44.91342 | 52.38095 |
| 0.405695971          | 0.101423993           | 61.03896              | 70.99567 | 64.06926 |
| 0.129202539          | 0.032300635           | 71.9697               | 73.59307 | 66.01732 |
| 0.041147305          | 0.010286826           | 75                    | 73.91775 | 72.94372 |
| 3                    | 2                     | 33.76623              | 34.30736 | 39.17749 |
| 0.955414013          | 0.636942675           | 52.70563              | 50.64935 | 53.24675 |
| 0.304271979          | 0.202847986           | 66.77489              | 61.90476 | 67.74892 |
| 0.096901904          | 0.064601269           | 83.00866              | 84.19913 | 75.75758 |
| 0.030860479          | 0.020573653           | 77.81385              | 84.74026 | 82.57576 |
| 2                    | 3                     | 19.95321              | 25.31994 | 25.45755 |
| 0.636942675          | 0.955414013           | 58.34595              | 53.66726 | 55.73139 |
| 0.202847986          | 0.304271979           | 74.0333               | 62.19898 | 61.64855 |
| 0.064601269          | 0.096901904           | 91.78478              | 96.87629 | 93.84891 |
| 0.020573653          | 0.030860479           | 101.555               | 101.1421 | 99.62846 |
| 1                    | 4                     | 18.30191              | 21.05408 | 16.92583 |
| 0.318471338          | 1.27388535            | 42.24577              | 43.48424 | 41.1449  |
| 0.101423993          | 0.405695971           | 49.53901              | 48.02532 | 50.36466 |
| 0.032300635          | 0.129202539           | 78.71199              | 74.0333  | 68.11614 |
| 0.010286826          | 0.041147305           | 79.26242              | 80.22568 | 76.37264 |
|                      | 5                     | 38.25513              | 37.56708 | 41.97055 |
|                      | 1.592356688           | 46.78684              | 45.27315 | 44.58511 |
|                      | 0.507119964           | 51.74075              | 44.17229 | 48.98858 |
|                      | 0.161503173           | 55.59378              | 56.41943 | 57.65791 |
|                      | 0.051434132           | 71.14353              | 67.70332 | 79.12481 |
| A concentration (μM) | B2 concentration(nM)  | A549 cell viability % |          |          |
| 5                    |                       | 46.56284              | 47.50669 | 43.41671 |
| 1.592356688          |                       | 79.91191              | 78.18153 | 76.60846 |

(Continued)

**Table S1:** *Continued*

| A concentration (µM) | B1 concentration (µM) | A549 cell viability % |          |          |
|----------------------|-----------------------|-----------------------|----------|----------|
| 0.507119964          |                       | 84.15919              | 81.64228 | 82.58613 |
| 0.161503173          |                       | 91.23801              | 89.35032 | 95.6426  |
| 0.051434132          |                       | 100.6764              | 97.68759 | 99.57527 |
| 4                    | 0.4                   | 36.4952               | 30.98946 | 26.27025 |
| 1.27388535           | 0.127388535           | 65.43967              | 55.84395 | 50.49552 |
| 0.405695971          | 0.040569597           | 77.08038              | 68.58581 | 61.66431 |
| 0.129202539          | 0.012920254           | 98.15951              | 87.30533 | 78.81076 |
| 0.041147305          | 0.004114731           | 103.1933              | 98.0022  | 97.05836 |
| 3                    | 0.8                   | 48.45053              | 35.39405 | 38.54019 |
| 0.955414013          | 0.25477707            | 58.67548              | 58.83278 | 51.75397 |
| 0.304271979          | 0.081139194           | 88.40648              | 76.45116 | 81.17036 |
| 0.096901904          | 0.025840508           | 101.3056              | 97.8449  | 96.90105 |
| 0.030860479          | 0.008229461           | 103.1933              | 97.37297 | 98.0022  |
| 2                    | 1.2                   | 23.2364               | 10.71379 | 24.34952 |
| 0.636942675          | 0.382165605           | 40.62891              | 29.21942 | 30.1934  |
| 0.202847986          | 0.121708791           | 78.47502              | 63.03047 | 78.61416 |
| 0.064601269          | 0.038760762           | 101.9897              | 97.25894 | 99.9026  |
| 0.020573653          | 0.012344192           | 97.67636              | 101.294  | 100.7374 |
| 1                    | 1.6                   | 19.0622               | 11.54863 | 3.061083 |
| 0.318471338          | 0.50955414            | 32.69793              | 30.05426 | 38.68095 |
| 0.101423993          | 0.162278389           | 87.93655              | 78.33588 | 92.11076 |
| 0.032300635          | 0.051681015           | 98.92862              | 101.4331 | 99.06776 |
| 0.010286826          | 0.016458922           | 98.5112               | 98.92862 | 102.268  |
|                      | 2                     | 15.72283              | 21.01016 | 19.47962 |
|                      | 0.636942675           | 33.81105              | 28.94114 | 34.64589 |
|                      | 0.202847986           | 58.16057              | 63.44789 | 61.63907 |
|                      | 0.064601269           | 85.15375              | 85.57117 | 90.44107 |
|                      | 0.020573653           | 95.7284               | 97.8155  | 100.8766 |
| 5                    |                       | 37.59515              | 53.9071  | 46.45021 |
| 1.592356688          |                       | 82.18114              | 86.37564 | 86.53099 |
| 0.507119964          |                       | 80.93833              | 97.09492 | 92.43436 |
| 0.161503173          |                       | 93.52183              | 99.58055 | 99.89125 |
| 0.051434132          |                       | 95.2307               | 101.9108 | 83.57931 |
| 4                    | 1                     | 34.33276              | 29.51686 | 32.00249 |
| 1.27388535           | 0.318471338           | 54.99456              | 52.81964 | 59.65512 |
| 0.405695971          | 0.101423993           | 57.01414              | 62.76216 | 60.27653 |
| 0.129202539          | 0.032300635           | 61.36399              | 70.52975 | 65.55849 |
| 0.041147305          | 0.010286826           | 85.59888              | 75.50101 | 111.8533 |
| 3                    | 2                     | 24.5456               | 34.02206 | 31.38108 |
| 0.955414013          | 0.636942675           | 38.52726              | 42.72176 | 46.91627 |

(Continued)

Table S1: Continued

| A concentration ( $\mu\text{M}$ ) | B1 concentration ( $\mu\text{M}$ ) | A549 cell viability % |          |          |
|-----------------------------------|------------------------------------|-----------------------|----------|----------|
| 0.304271979                       | 0.202847986                        | 51.26612              | 45.5181  | 50.48936 |
| 0.096901904                       | 0.064601269                        | 70.06369              | 61.36399 | 76.43312 |
| 0.030860479                       | 0.020573653                        | 69.75299              | 76.58847 | 68.97623 |
| 2                                 | 3                                  | 40.43698              | 34.5671  | 38.96951 |
| 0.636942675                       | 0.955414013                        | 50.38317              | 52.66591 | 55.92695 |
| 0.202847986                       | 0.304271979                        | 56.41611              | 58.53579 | 58.69884 |
| 0.064601269                       | 0.096901904                        | 62.77515              | 66.19925 | 64.56873 |
| 0.020573653                       | 0.030860479                        | 81.68922              | 82.66754 | 79.08038 |
| 1                                 | 4                                  | 42.0675               | 35.70846 | 30.81689 |
| 0.318471338                       | 1.27388535                         | 44.51329              | 49.89402 | 67.34062 |
| 0.101423993                       | 0.405695971                        | 56.74221              | 51.03538 | 72.06913 |
| 0.032300635                       | 0.129202539                        | 53.31812              | 70.60166 | 75.33018 |
| 0.010286826                       | 0.041147305                        | 64.56873              | 74.84102 | 67.82977 |
|                                   | 5                                  | 33.58878              | 33.91489 | 30.97994 |
|                                   | 1.592356688                        | 49.73096              | 48.5896  | 45.1655  |
|                                   | 0.507119964                        | 54.62253              | 52.3398  | 58.04663 |
|                                   | 0.161503173                        | 58.37274              | 57.23137 | 60.65547 |
|                                   | 0.051434132                        | 80.87396              | 77.12376 | 79.40649 |

Table S2: IC50 value of Apatinib and chemotherapy agent in different treatment groups

| A combined<br>with B | A+B1               |                     | A+B2               |        | A+B3               |                     |
|----------------------|--------------------|---------------------|--------------------|--------|--------------------|---------------------|
|                      | Drug               | Drug                | Drug               | Drug   | Drug               | Drug                |
|                      | A( $\mu\text{M}$ ) | B1( $\mu\text{M}$ ) | A( $\mu\text{M}$ ) | B2(nM) | A( $\mu\text{M}$ ) | B3( $\mu\text{M}$ ) |
| A                    | 5.384              | 0                   | 2.693              | 0      | 5.275              | 0                   |
| B                    | 0                  | 0.75                | 0                  | 0.484  | 0                  | 0.876               |
| 4/5A+1/5B            | 0.827              | 0.207               | 1.43               | 0.143  | 1.1                | 0.274               |
| 3/5A+1/5B            | 1.09               | 0.728               | 1.568              | 0.418  | 0.442              | 0.295               |
| 2/5A+3/5B            | 0.644              | 0.966               | 0.641              | 0.385  | 0.579              | 0.868               |
| 1/5A+4/5B            | 0.12               | 0.483               | 0.313              | 0.501  | 0.286              | 1.143               |

**Table S3:** qRT-PCR primers for Zebrafish

| Gene               | Forward primer 5'–3'     | Reverse primer 5'–3'     |
|--------------------|--------------------------|--------------------------|
| vegfaa             | CTCCATCTGTCTGCTGTAAGG    | GGGATACTCCTGGATGATGTCTA  |
| kdr/flk1/ vegfr    | CCTGAGACCATCTTTGACCG     | GTCCCTCTT TAAGTCGCCTG    |
| ft1/vegfr-1        | GTATTTGAACAGCACGGGTTAG   | CGGCTCTTGATATGCGTTTG     |
| Dll4               | AGGCCTGGCACTCACCTTACTC   | CACCCAGCCCTCTTTACAGTT    |
| Notch1a            | GCCGCAGATGCAGGGCAATGAAGT | GAGGGCAGGCAGGGCTGGTAGAGG |
| hey2               | CGGCTTCCGGGAGTGTCTGACT   | TCCCCACGGTCGGTATGGTTTA   |
| efnb2a             | TTGGGGCCTGGAGTTCTTCAGA   | TCTTGGGCGTGGCTAATGTGCT   |
| Slit2              | GAGCGACTGGACCTGAATG      | GTAGATCCTGAAATGCCCTC     |
| slit3              | GCGAGTGTTC AAGACCTG      | GATTTCAATGTGCTTCAGCCG    |
| Robo1              | AGGAGTCACATACAGGCTAGAG   | GTCTGAGATCTGCTGGGAAATG   |
| Robo2              | GAGGTGTGGATGTGGACTATG    | CTACAATCCGAGGTGAGAAATC   |
| robo4              | GAGATCAGTCCCAAACACAG     | CCCACAGATATAGCCCAACG     |
| Fgfr1              | CCTGCGCAACGATCAGATGGAGAT | TTGCCGTTTTTAAGCCACTTGAGC |
| Fgfr2              | CCCCGACAACCGCACGCTCGTA   | TAGCCGCCCATGCGATCCTCCTGT |
| Fgfr3              | TCCCCGTATCCAGGTATCC      | TCTGAACGTGGGTCTTTGTG     |
| Fgfr4              | GCTGCGCATTGGATTGACCGATAA | AGGCCCCAGGCGATTACTGTCCTT |
| COX2               | CCTCCGGCCATCATTCTTATT    | CCGCAGATTCAGAGCATTGTC    |
| Mmp9               | GTGCCGGACATCCGCAACTACA   | CACCAGGGAAGGCCATCTGTGC   |
| VE-cadherin/cdh5   | TGCTCGCATTATGTAGCCTCAGTA | AGAATCGAAAACGGGGATGTTG   |
| ptp-rb             | TTGGGCAGCATGCGGAATACTGAG | TTACCAGGCTGCCATGAAACATCC |
| pik3r2/p85 $\beta$ | CCCCGAAACTGCTCCCCCTAATCT | AGCGGAGGAGTCGGCTCTTGTT   |
| ef1                | GGAAATTCGAGACCAGCAAATAC  | GATACCAGCCTCAAACCTCACC   |

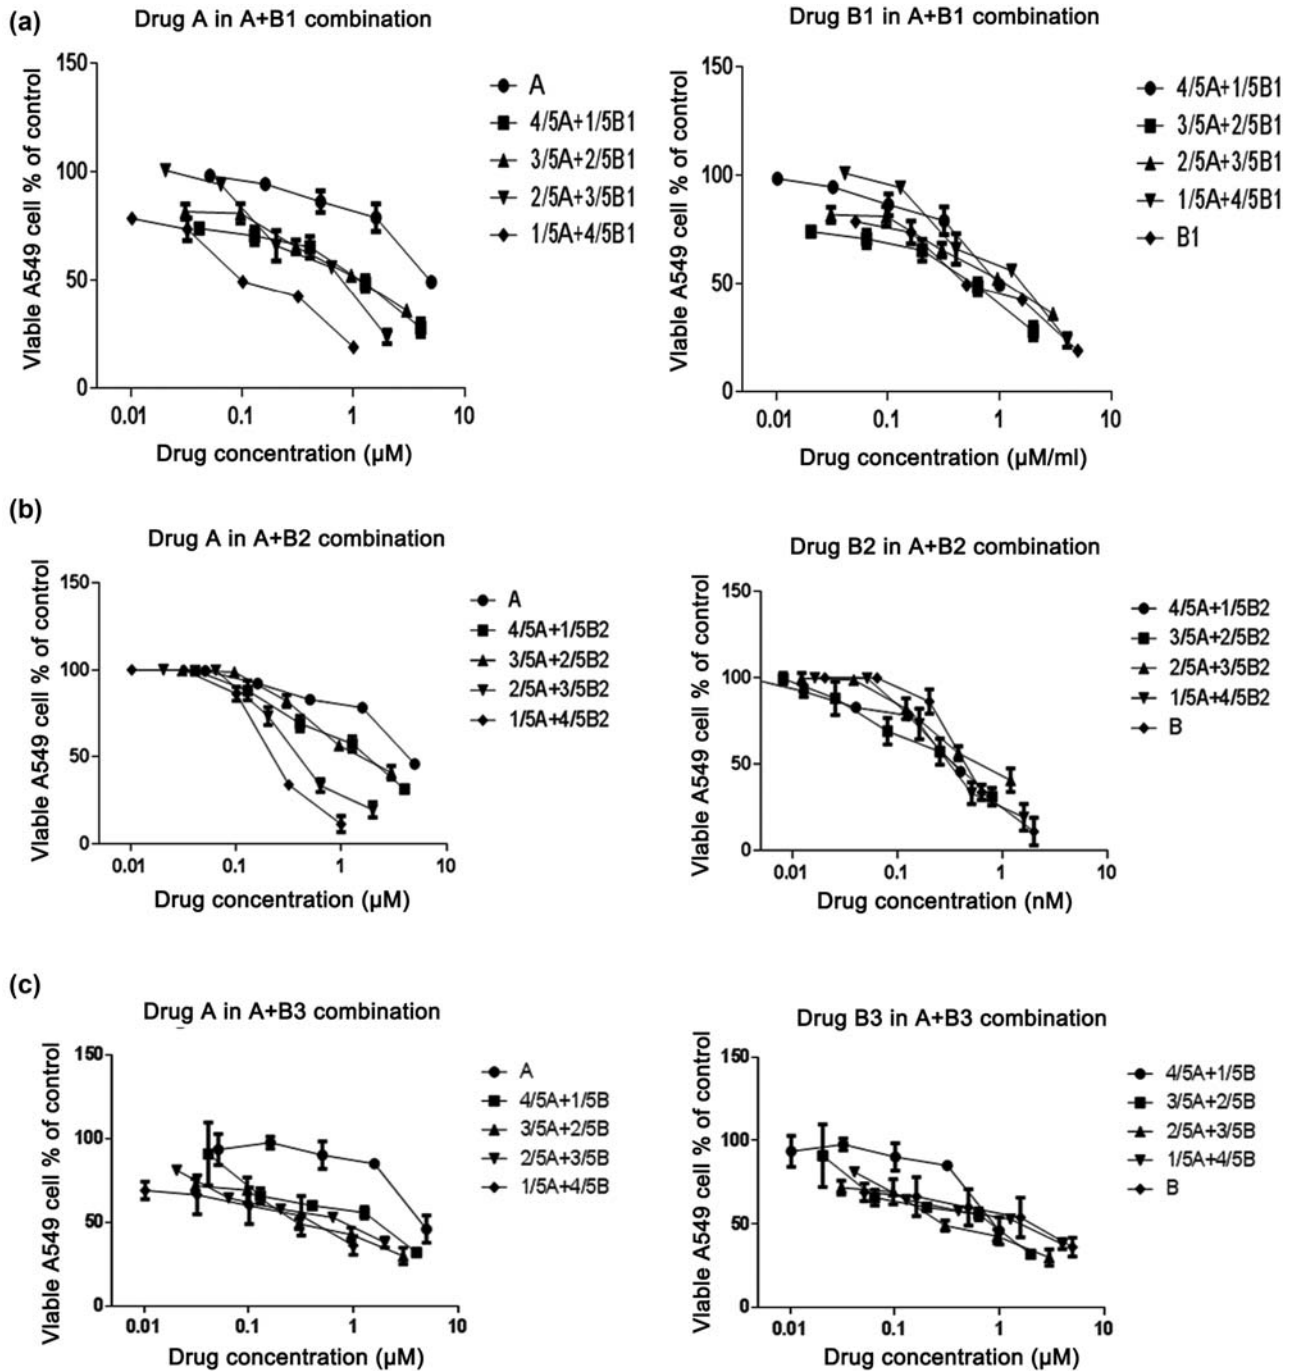

**Figure S1:** Effects of Apatinib combined with chemotherapy in A549 cell line. Apatinib was named drug A and cytotoxic agents were named drug B (Gemcitabine, Paclitaxel, Pemetrexed, were named B1, B2, B3, respectively) for the convenience of discussion. There are four combination proportions of Apatinib and cytotoxic agents. The anticancer effects of Apatinib/chemotherapy agent alone and Apatinib combined with chemotherapy agent were detected using MTT assay (S1A), (S1B), (S1C). As the drug concentrations of either Apatinib or Gemcitabine increased, the viability of A549 cell decreased.

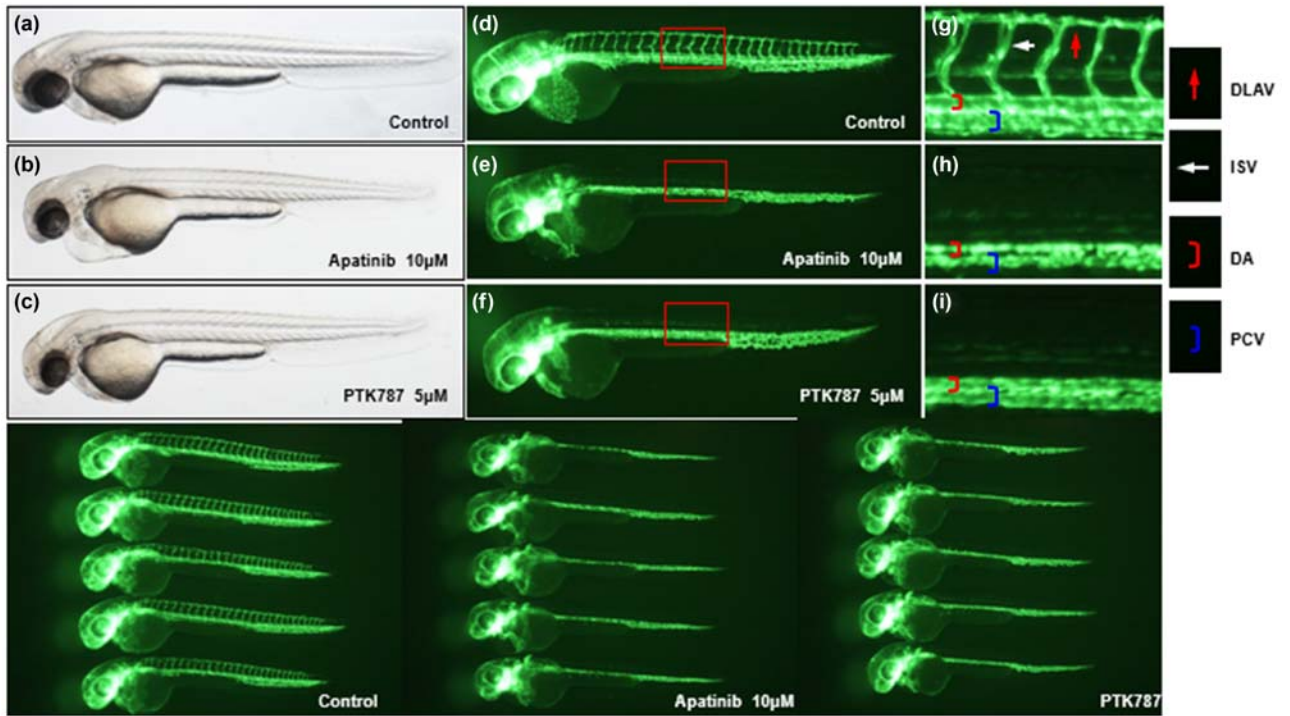

Figure S2: Apatinib inhibits zebrafish angiogenesis.

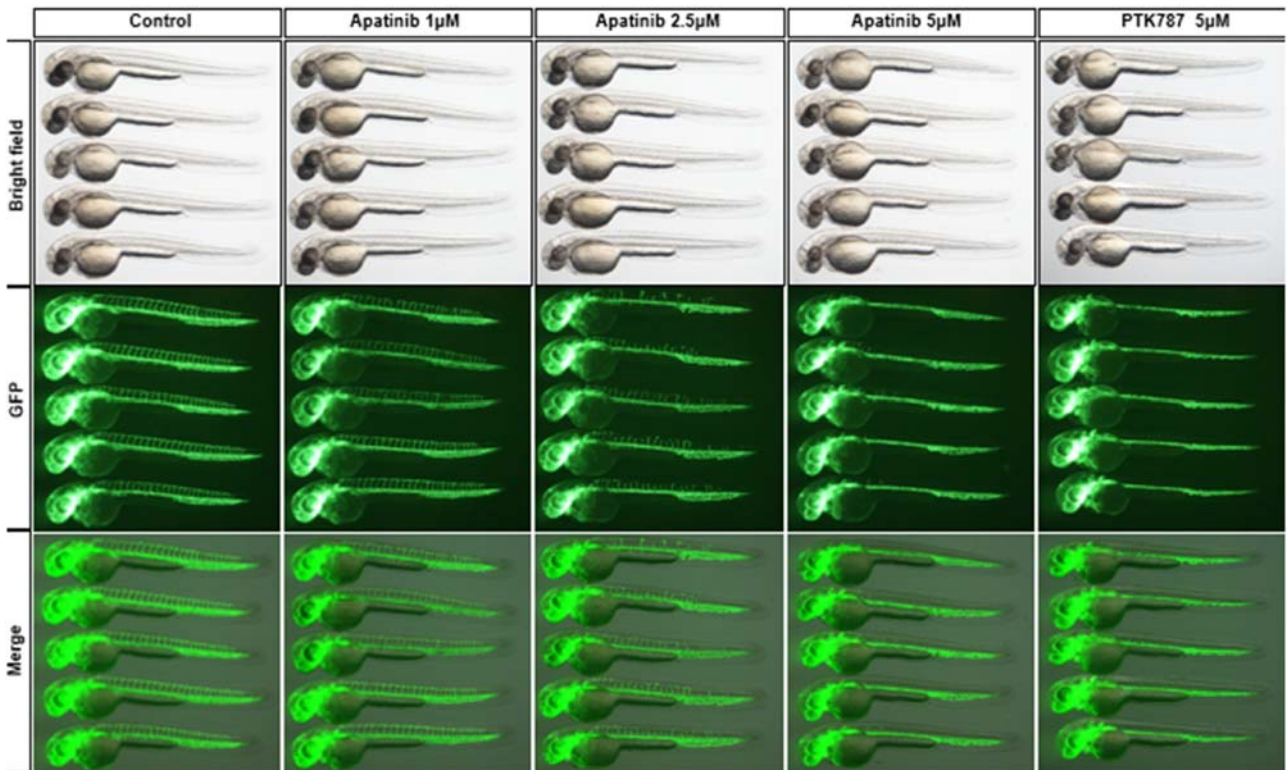

Figure S3: Apatinib inhibits zebrafish angiogenesis.

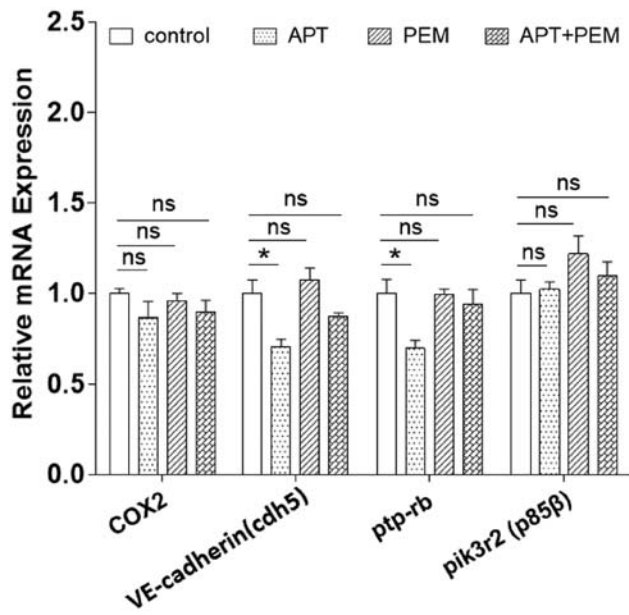

**Figure S4:** The relative mRNA expression levels of COX-2, VE-cadherin, PTP-RB and PIK3R2 genes in different treatment groups. (Apatinib, Pemetrexed and Apatinib combined with Pemetrexed were named APT, PEM, APT+PEM, respectively).
